# Supplementary material
Source: publisher site journal article supplement (https://www.dovepress.com/article/547500)
Supplement: Supplementary file 1 [file Supplementary%20Material.docx]

# **Supplementary Tables**

## **Table S1:** Multicollinearity test of LASSO-select variables

| Variables | VIF | Tolerance |
| --- | --- | --- |
| Age | 2.797 | 0.357 |
| TNM | 1.332 | 0.751 |
| ECOG PS | 2.825 | 0.354 |
| PLR | 1.534 | 0.652 |
| SII | 1.546 | 0.647 |
| PNI | 1.625 | 0.615 |
| NMR | 1.222 | 0.818 |

Abbreviations: LASSO, Least absolute shrinkage and selection operator; VIF, variance inflation factor; TNM, Tumor‐node‐metastasis; ECOG PS, Eastern Cooperative Oncology Group performance status; PLR, Platelet‐to‐lymphocyte ratio; SII, Systemic immunoinflammatory index; PNI, Prognostic nutritional index; LMR, Lymphocyte‐to‐monocyte ratio.

## **Table S2:** Simplified Scoring System for Predicting OS and Corresponding Variable Points

| Variables |  | Score |
| --- | --- | --- |
| SII | ≥798.421 | 0 |
| <798.421 | 74 |
| PNI | <45.775 | 0 |
| ≥45.775 | 98 |
| TNM stage | III | 0 |
| IV | 100 |

Abbreviations: OS, Overall Survival; SII, Systemic immunoinflammatory index; PNI, Prognostic nutritional index; TNM, Tumor‐node‐metastasis.

## **Table S3:** Simplified Scoring System for Predicting Progression-Free Survival (PFS) and Corresponding Variable Points

| Variables |  | Score |
| --- | --- | --- |
| SII | ≥798.421 | 0 |
| <798.421 | 50 |
| PNI | <45.775 | 0 |
| ≥45.775 | 57 |
| TNM stage | III | 0 |
| IV | 100 |

Abbreviations: PFS, Progression-Free Survival; SII, Systemic immunoinflammatory index; PN I, Prognostic nutritional index; TNM, Tumor‐node‐metastasis.

## **Table S4:** The Predictive Performance (C‐Index, NRI and IDI) of Different Models for Predicting ESCC patients’ OS and PFS in the Primary Cohort and Validation Cohort

| Model | Author | Model | Index | Outcome | Primary cohort | | | Validation cohort | | |
| --- | --- | --- | --- | --- | --- | --- | --- | --- | --- | --- |
| Estimate | 95%CI | P value | Estimate | 95%CI | P value |
| My model | Xiaodan Liu et al. 2025 | A nomogram model including SII, PNI, and TNM | C-index | OS | 0.842 | 0.803-0.880 | - | 0.873 | 0.819-0.920 | - |
| PFS | 0.687 | 0.635-0.739 | - | 0.706 | 0.633-0.779 | - |
| Other Model1 | Youmei Li et al. 2025 | A nomogram model including PNI, NLR, and PLR | C-index | OS | 0.815 | 0.771-0.860 | - | 0.821 | 0.752-0.891 | - |
| PFS | 0.646 | 0.593-0.700 | - | 0.681 | 0.597-0.765 | - |
| NRI | 1-year OS | 0.135 | -0.166-0.322 | - | 0.259 | -0.233-0.701 | - |
| 2-year OS | 0.136 | -0.102-0.288 | - | 0.452 | -0.045-0.687 | - |
| 3-year OS | 0.134 | -0.031-0.355 | - | 0.471 | -0.031-0.813 | - |
| 1-year PFS | 0.245 | 0.058-0.397 | - | 0.393 | -0.114-0.740 | - |
| 2-year PFS | 0.272 | -0.008-0.407 | - | -0.077 | -0.185-0.457 | - |
| 3-year PFS | 0.228 | -0.080-0.463 | - | 0.062 | -0.342-0.352 | - |
| IDI | 1-year OS | 0.030 | -0.047-0.083 | 0.299 | 0.114 | -0.001-0.332 | 0.052 |
| 2-year OS | 0.087 | 0.010-0.148 | 0.016 | 0.116 | 0.031-0.300 | 0.016 |
| 3-year OS | 0.148 | 0.028-0.272 | 0.012 | 0.228 | 0.052-0.463 | 0.004 |
| 1-year PFS | 0.096 | 0.016-0.190 | 0.016 | 0.111 | -0.040-0.260 | 0.196 |
| 2-year PFS | 0.171 | 0.036-0.303 | 0.008 | 0.027 | -0.082-0.274 | 0.587 |
| 3-year PFS | 0.192 | 0.031-0.336 | 0.012 | 0.015 | -0.175-0.263 | 0.938 |
| The TNM staging system | - | T stage, N stage, and M stage | C-index | OS | 0.713 | 0.673-0.754 | - | 0.728 | 0.676-0.781 | - |
| PFS | 0.637 | 0.591-0.683 | - | 0.619 | 0.552-0.685 | - |
| NRI | 1-year OS | 0.650 | 0.423-0.903 | - | 0.705 | 0.262-1.063 | - |
| 2-year OS | 0.043 | -0.110-0.225 | - | 0.109 | -0.242-0.729 | - |
| 3-year OS | 0.065 | -0.108-0.792 | - | -0.072 | -0.381-0.619 | - |
| 1-year PFS | -7.278e-03 | -0.082-0.392 | - | 0.442 | -0.131-0.906 | - |
| 2-year PFS | 0.148 | -0.094-0.331 | - | 0.079 | -0.006-0.505 | - |
| 3-year PFS | -0.042 | -0.130-0.347 | - | 0.313 | -0.023-0.512 | - |
| IDI | 1-year OS | 0.227 | 0.058-0.408 | <0.001 | 0.151 | 0.018-0.906 | 0.024 |
| 2-year OS | 0.167 | 0.041-0.294 | 0.008 | 0.221 | 0.065-0.404 | 0.004 |
| 3-year OS | 0.152 | 0.060-0.293 | 0.008 | 0.175 | -0.052-0.382 | 0.116 |
| 1-year PFS | 0.030 | 0.003-0.100 | 0.032 | 0.081 | 0.003-0.178 | 0.048 |
| 2-year PFS | 0.038 | -0.007-0.118 | 0.096 | 0.107 | 0.013-0.225 | 0.024 |
| 3-year PFS | 0.025 | -0.022-0.128 | 0.267 | 0.099 | -0.017-0.270 | 0.084 |

Abbreviations: TNM, Tumor‐node‐metastasis; C-index, Index of concordance; NRI, Net reclassification improvement; IDI, Integrated discrimination improvement; SII, Systemic immunoinflammatory index; PNI, Prognostic nutritional index; NLR, Neutrophil‐to‐lymphocyte ratio; PLR, Platelet‐to‐lymphocyte ratio.

## **Table S5:** Comparison of AUC values among models on the primary cohort

| Model | | My model | Other Model1 | TNM staging system |
| --- | --- | --- | --- | --- |
| 0.720 | 0.670 | 0.668 |
| My model | 0.720 | NA | 0.039 | 0.002 |
| Other Model1 | 0.670 | 0.050 | NA | 0.943 |
| TNM staging system | 0.668 | 0.052 | 0.002 | NA |

Abbreviations: AUC, area under the receiver-operating curve; TNM, tumor-node-metastasis staging system.

## **Table S6:** Comparison of AUC values among models on the validation cohort

| Model | | My model | Other Model1 | | TNM staging system |
| --- | --- | --- | --- | --- | --- |
| 0.855 | | 0.743 | 0.816 |
| My model | 0.855 | NA | | <0.001 | 0.213 |
| Other Model1 | 0.743 | 0.112 | | NA | 0.180 |
| TNM staging system | 0.816 | 0.039 | | 0.073 | NA |

Abbreviations: AUC, area under the receiver-operating curve; TNM, tumor-node-metastasis staging system.

1 Li Y, Wang H, Zhao X, Deng W, Song C, Wen J, et al. Prognostic value of immunotrophic inflammatory markers in ESCC undergoing chemoradiotherapy combined with immunotherapy. Scientific Reports. 2025;15:doi:10.1038/s41598-025-02454
